# Supplementary material for: Monolithic nitrogen-doped graphene frameworks as ultrahigh-rate anodes for lithium ion batteries
Source: Royal Society of Chemistry journal article supplement (doi:10.1039/c5ta03706a), 2015-01-01
Supplement: c5ta03706a1.pdf [file c5ta03706a1.pdf]

Supporting Information for

## Monolithic Nitrogen-Doped Graphene Frameworks as Ultrahigh-Rate Anodes for Lithium Ion Batteries

Xilai Jia,<sup>a\*</sup> Guolin Zhang,<sup>a</sup> Tihong Wang,<sup>a</sup> Xiao Zhu,<sup>a</sup> Fan Yang,<sup>a</sup> Yongfeng Li,<sup>a</sup> Yunfeng Lu,<sup>c\*</sup>  
and Fei Wei<sup>b\*</sup>

<sup>a</sup>State Key Laboratory of Heavy Oil Processing, China University of Petroleum, Beijing, Changping 102249, P. R. China. E-mail: jiaxily@gmail.com

<sup>b</sup>Beijing Key Laboratory of Green Chemical Reaction Engineering and Technology, Department of Chemical Engineering, Tsinghua University, Beijing 100084, People's Republic of China. E-mail: wf-dce@tsinghua.edu.cn

<sup>c</sup>Department of Chemical and Biomolecular Engineering, University of California, Los Angeles, California 90095, United States. E-mail: luucla@ucla.edu

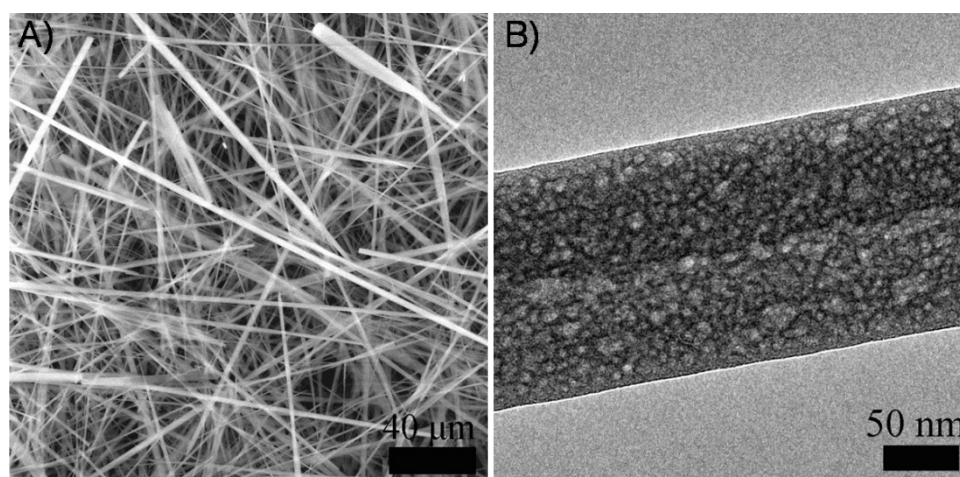

**Fig. S1** A) SEM and B) TEM images of MgO precursor nanowires.

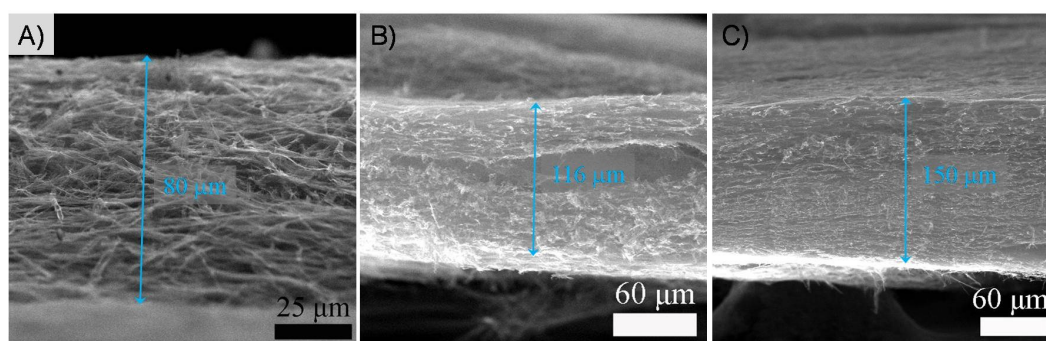

**Fig. S2** The monolithic NPGF films with different thickness.

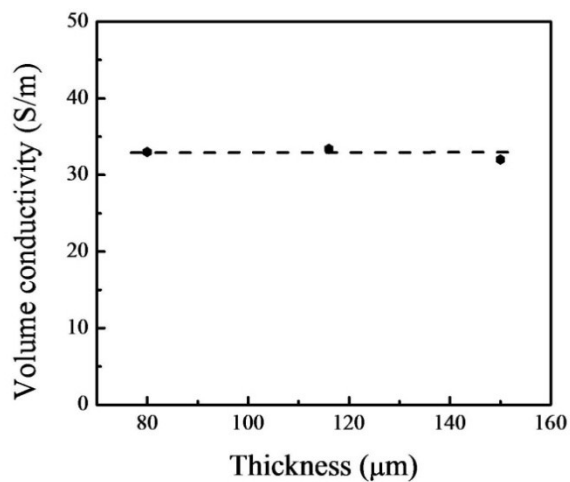

**Fig. S3** The electric conductivities of NPGF films with different thickness.

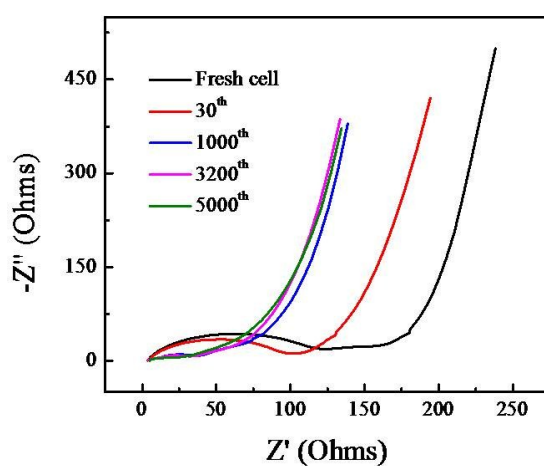

**Fig. S4** Electrochemical impedance spectra of the NPGF electrode at fresh half-coin cell, 30<sup>th</sup>, 1000<sup>th</sup>, 3200<sup>th</sup>, and 5000<sup>th</sup> cycles over the frequency range of  $10^5$ -0.01 Hz.

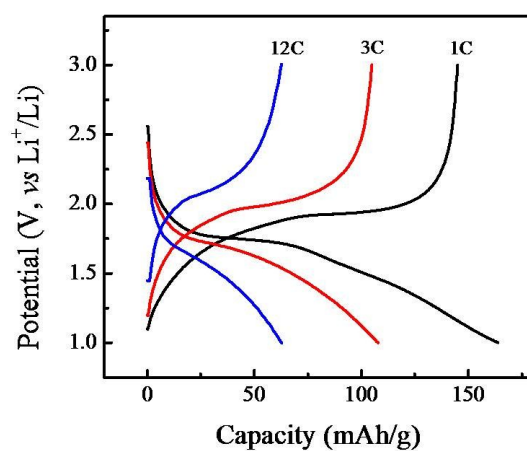

**Fig. S5** Charge/discharge curves of  $\text{TiO}_2$ @NPGF film electrode at 1, 3, and 12 C rates (the electrode was prepared by dropping  $\text{TiO}_2$  solution onto NPGF film;  $\text{TiO}_2$  was 70-wt% in electrode).
